# Supplementary material
Source: PubMed Central journal article supplement (PMC3129200)
Supplement: supp_M110.212209_jbc.M110.212209-1.pdf [file supp_M110.212209_jbc.M110.212209-1.pdf]

Supplemental figure 1, Barkefors et al.

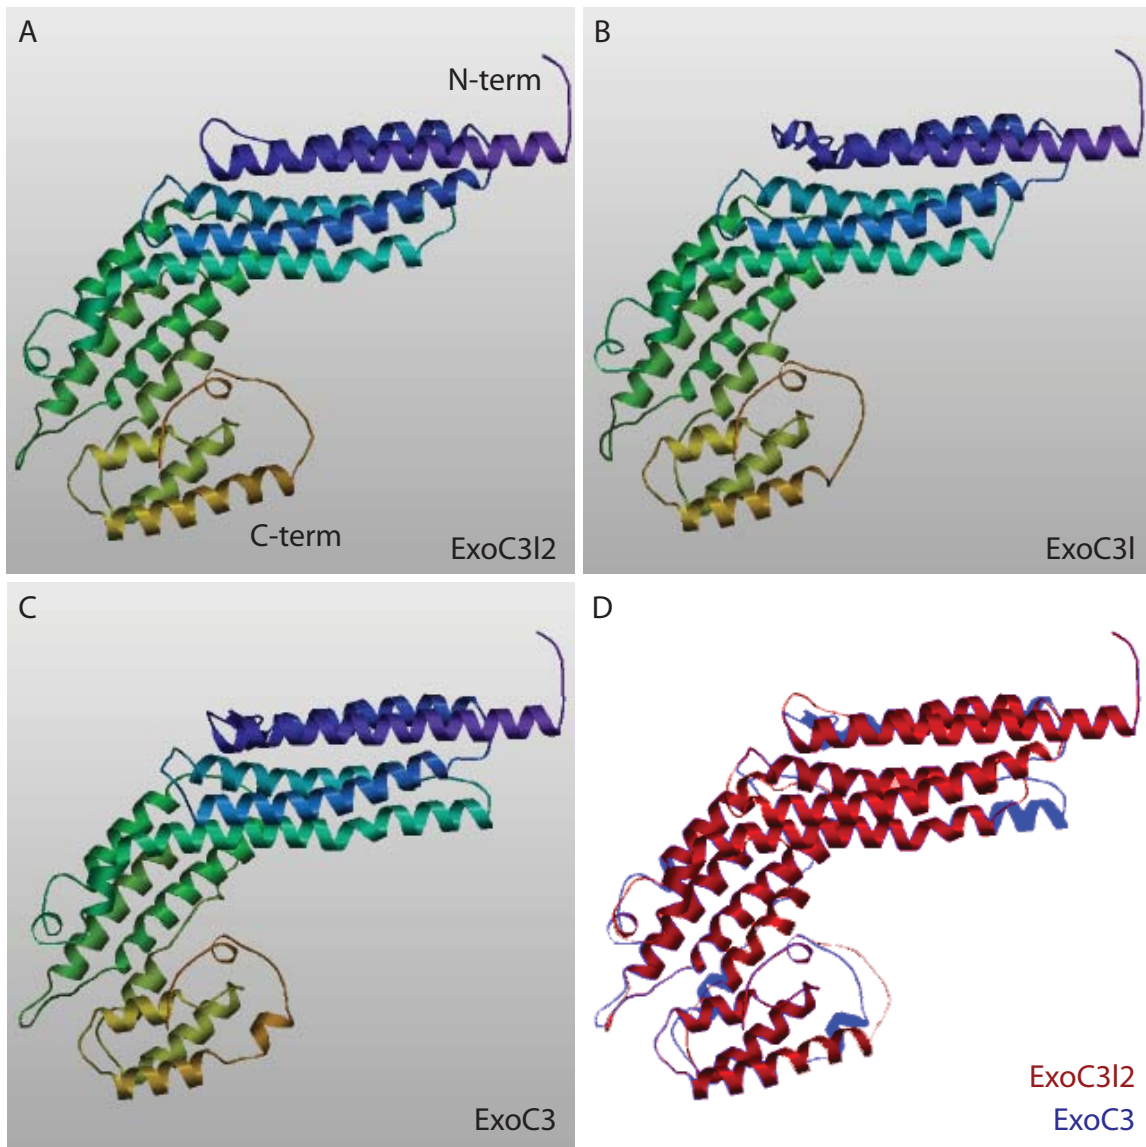

**Supplemental Figure 1. Predictions of the tertiary structures of EXOC3L and EXOC3L2.** (A-C) Predictions of the tertiary structures of EXOC3L2 (A) and EXOC3L (B) from the structure of the N-terminal domains of EXOC3 (ID:2FJI)(C) using SWISS-MODEL (<http://swissmodel.expasy.org>). (D) The models of EXOC3 (blue) and EXOC3L2 (red) superimposed.
