# Supplementary material
Source: PubMed Central journal article supplement (PMC3129200)
Supplement: supp_M110.212209_jbc.M110.212209-2.pdf [file supp_M110.212209_jbc.M110.212209-2.pdf]

Supplemental figure 2, Barkefors et al.

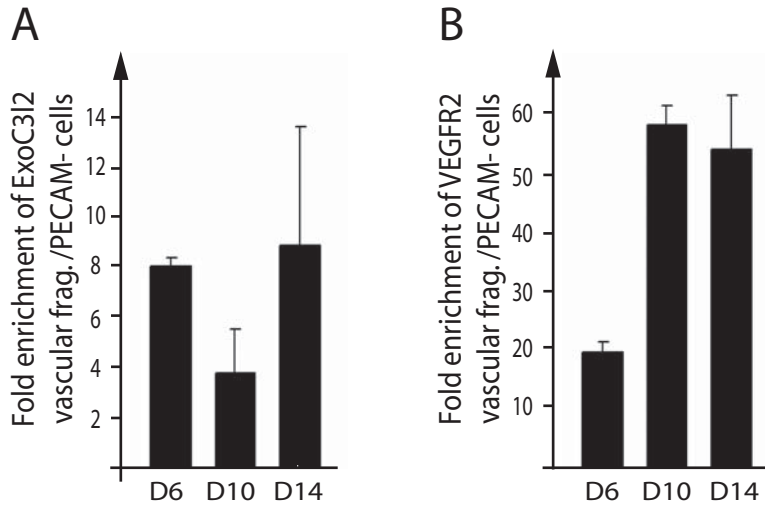

**Supplemental Figure 2. Expression of *exoc3l2* mRNA at different time points in the EB cultures.** (A) Endothelial cells were extracted from VEGFA-stimulated EBs using magnetic beads and the expression of *exoc3l2* was measured after 6, 10 and 14 days in culture. The results were compared to the expression in the PECAM<sup>-</sup> cells. (B) The expression of VEGFR2 in the endothelial cell population, compared to PECAM<sup>-</sup>, after 6, 10 and 14 days in culture.
