# Supplementary material
Source: PubMed Central journal article supplement (PMC3129200)
Supplement: supp_M110.212209_jbc.M110.212209-3.pdf [file supp_M110.212209_jbc.M110.212209-3.pdf]

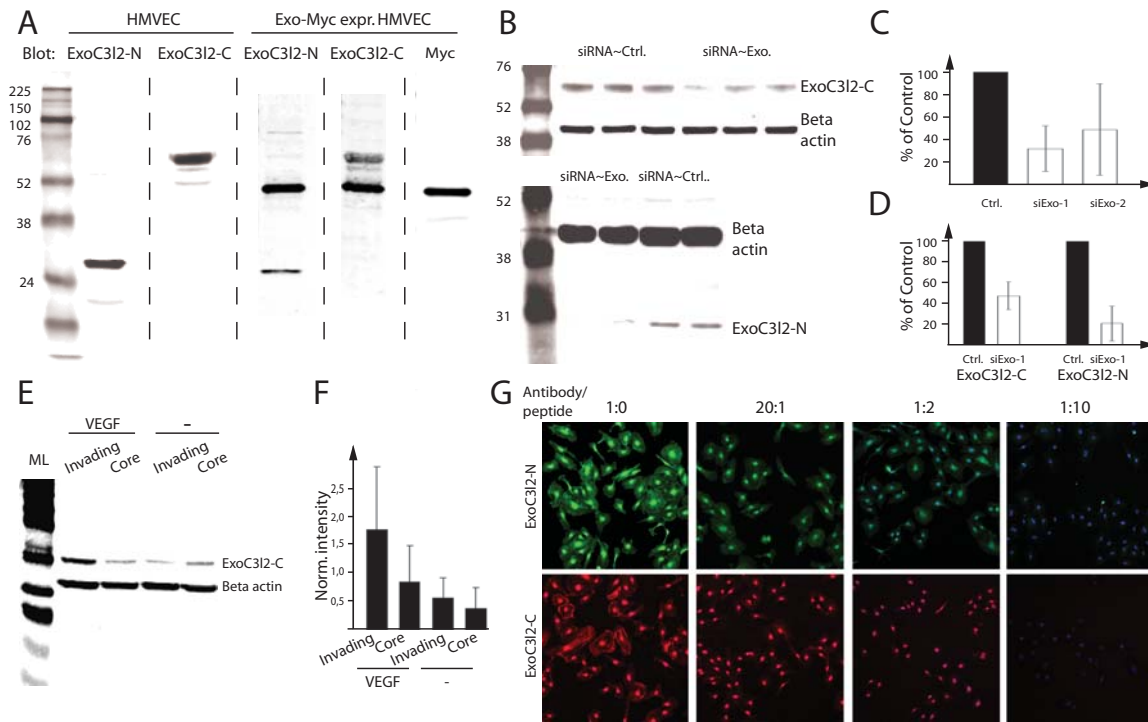

**Supplemental Figure 3. Evaluation of antibodies recognizing EXOC3L2, and siRNA-mediated knockdown of EXOC3L2.**

(A) Western blot of total lysate from untransfected HMVECs or from HMVECs transfected with Myc-tagged EXOC3L2, stained for ExoC312-C, ExoC312-N or Myc. (B) Cells transfected with siRNA for EXOC3L2 or control siRNA were incubated for 48 h in presence of VEGFA and total lysate was blotted for ExoC312-C (top) or ExoC312-N (bottom). Beta-actin was used as loading control. (C) Expression levels of *exoc3l2* mRNA 24 h post siRNA transfection (n=3). (D) Quantification of the results in B. Odyssey imaging software was used to measure band intensity and all bands were normalized against beta actin (n=3). (E) Western blot analysis of EXOC3L2 expression in the EB fractions used for the micro array study. (F) Quantification of the results in E. (G) HMVECs were stained with ExoC312-C or ExoC312-N in combination with increasing concentrations of the respective peptide used for immunization.
