# Supplementary material
Source: PubMed Central journal article supplement (PMC3129200)
Supplement: supp_M110.212209_jbc.M110.212209-4.pdf [file supp_M110.212209_jbc.M110.212209-4.pdf]

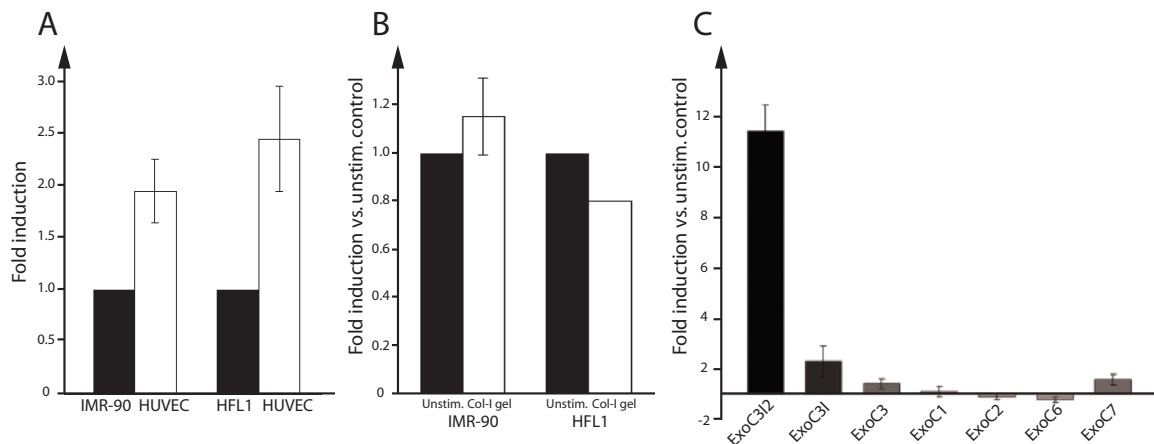

**Supplemental Figure 4. Expression of *exoc3l2* and known exocyst components.**

(A) Expression of *exoc3l2* transcripts in HUVECs compared to the fibroblast cell lines IMR-90 and HFL1 as measured by qPCR. (B) The mRNA levels of *exoc3l2* in fibroblasts when cells were cultured on a 3D collagen-I matrix compared to an untreated 2D surface. (C) The effect of collagen and VEGFA simulation on the expression levels of the different exocyst complex components in HMVEC. Cells were seeded on a collagen matrix and incubated for 24h in full medium supplemented with 100 ng/ml VEGFA. The unstimulated control was maintained on regular cell culture treated plastic in full medium without VEGFA supplement.
