# Supplementary material
Source: PubMed Central journal article supplement (PMC3129200)
Supplement: supp_M110.212209_jbc.M110.212209-5.pdf [file supp_M110.212209_jbc.M110.212209-5.pdf]

Supplemental figure 5, Barkefors et al.

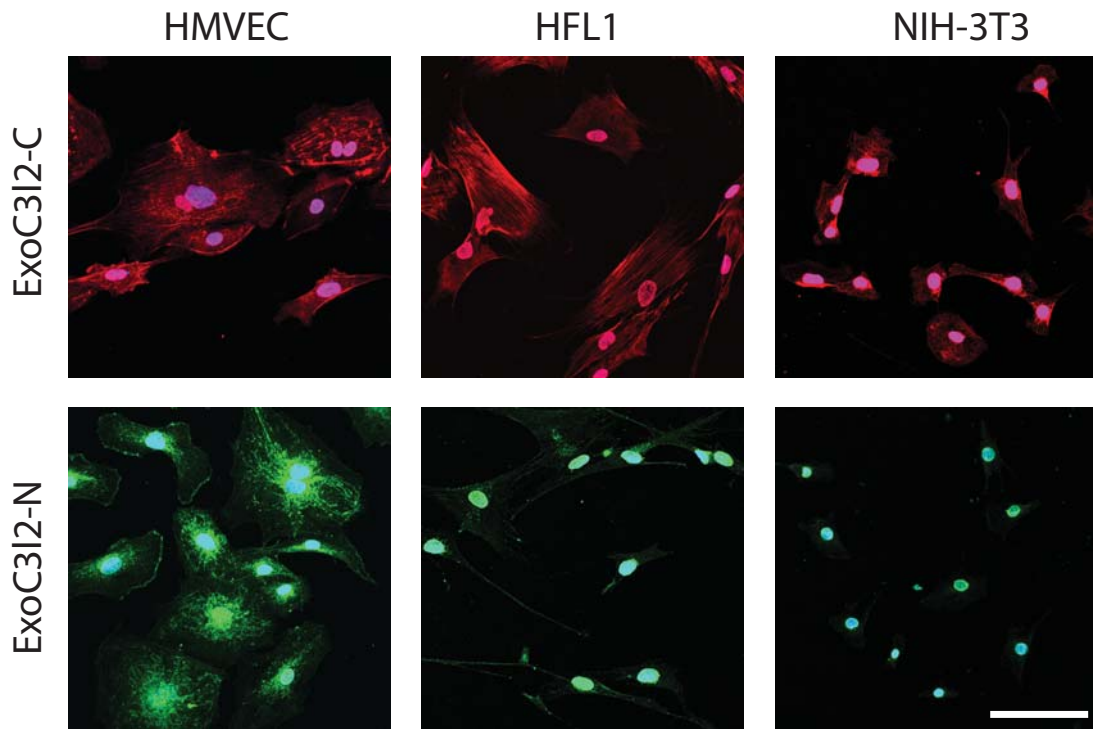

**Supplemental Figure 5. ExoC3I2-C and ExoC3I2-N stainings in different cell lines.** Human endothelial cells (HMVEC), human fibroblasts (HFL1) and mouse fibroblast (NIH-3T3) stained for ExoC3I2-C or ExoC3I2-N.
