# Supplementary material
Source: PubMed Central journal article supplement (PMC3129200)
Supplement: supp_M110.212209_jbc.M110.212209-6.pdf [file supp_M110.212209_jbc.M110.212209-6.pdf]

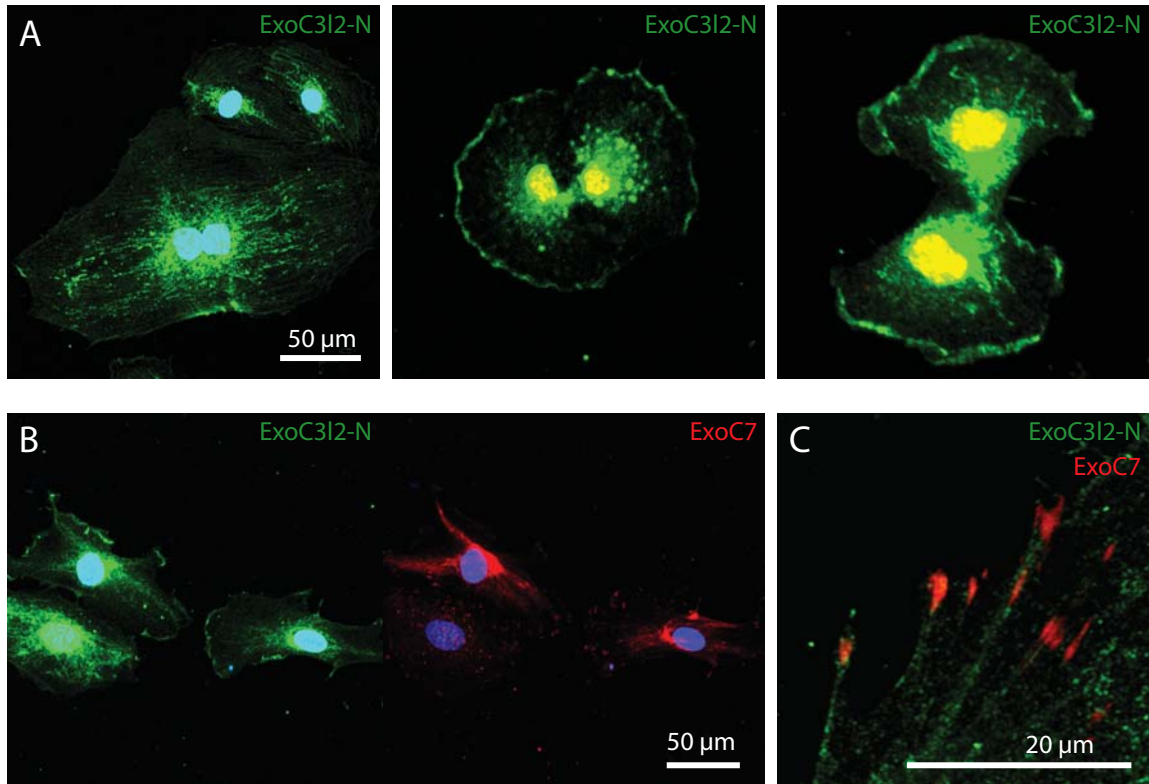

**Supplemental Figure 6. EXOC3L2 protein distribution in dividing cells.**

(A) Dividing HMVECs stained for ExoC312-N. (B) HMVECs stained for ExoC312-N and EXOC7. (C) Peripheral region of a cell stained for ExoC312-N and EXOC7.
